# Supplementary material for: Single shot laser flash photolysis with a fibre-coupled reference beam monitor
Source: Royal Society of Chemistry journal article supplement (doi:10.1039/c2pp25170a), 2012-08-21
Supplement: c2pp25170a.pdf [file c2pp25170a.pdf]

## Electronic Supplementary Information

### Single shot laser flash photolysis with a fibre-coupled reference beam monitor

Heng Li, Leonie van 't Hag, Yaser A. Yousef, T. B. Melø and K. Razi Naqvi\*

The purpose of this supplement is to provide additional assistance, in the form of photographs, to those who may wish to reproduce the experimental arrangement employed by the authors and depicted schematically in Figure 1 of the main article.

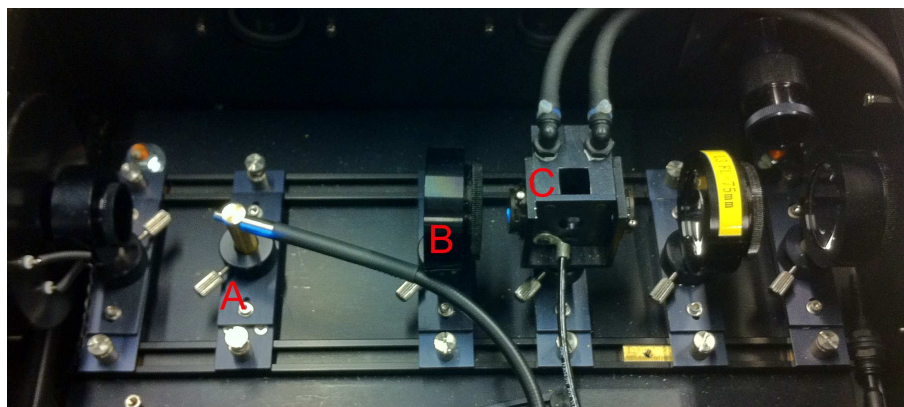

Fig. S1. A view of the modified sample compartment.

Fig. S1 provides a view of the modified sample compartment. The modification consists in placing a fibre optic holder (A) on the optical rail containing the collimating lens (B) and the cuvette holder (C).

Fig. S2 provides a view of the cross section (18 mm × 18 mm) of the monitoring beam and the location of the optical fibre, whose tip is placed where the red circle is shown.

Fig. S3 provides a view of the cross section of the monitoring beam, which becomes rectangular (14 mm × 20 mm) and the right half of its bottom part shows the light blocked by the optical fibre and its holder.

Fig. S4 shows that the placing or removing the optical fibre will not affect the light passing through the sample cell.

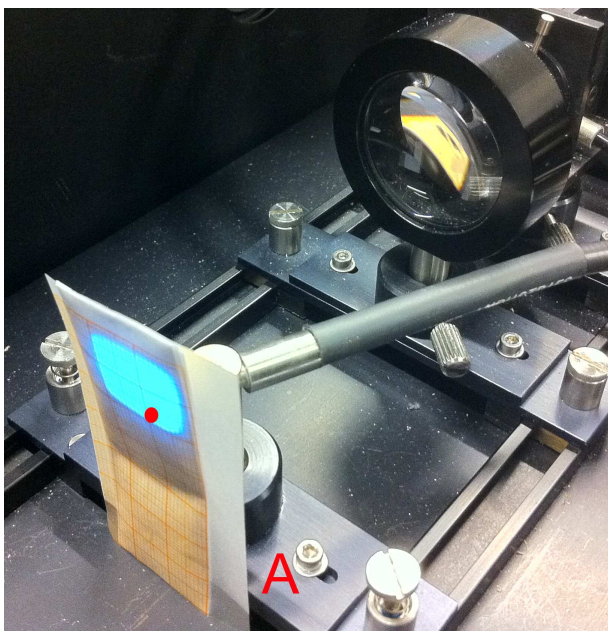

Fig. S2. Cross section of the monitoring beam immediately before it is interrupted by the optical fibre (whose tip is indicated by the red dot).

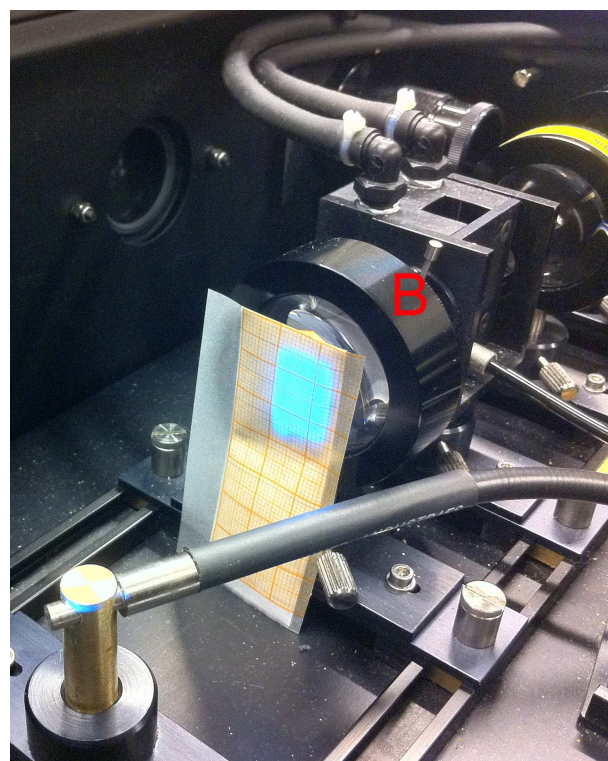

Fig. S3. Cross section of the monitoring beam immediately before lens B.

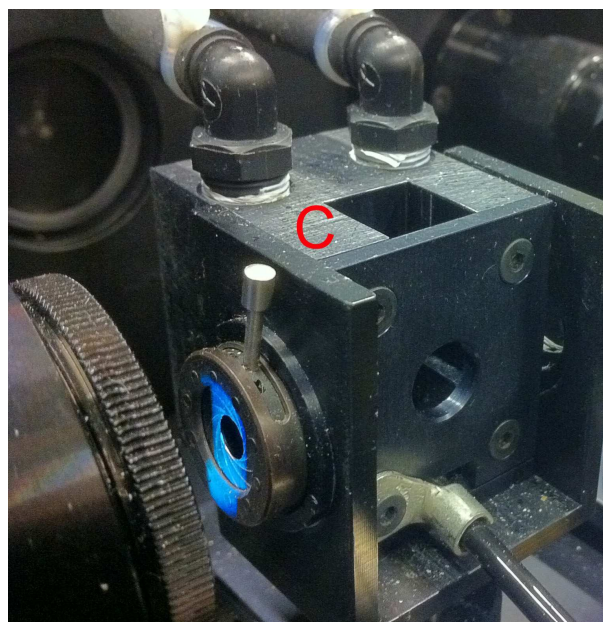

Fig. S4. A view of the aperture used for selecting the central portion of the monitoring beam and allowing it to proceed to the cuvette holder (C).
